# Supplementary material for: Cytosine–guanine base pairing in a hydrogen-bonded complex of stable open-shell molecules with S = 1 spins
Source: Royal Society of Chemistry journal article supplement (doi:10.1039/b706521n), 2007-01-01

Cytosine-guanine base pairing in a hydrogen-bonded complex of  
stable open-shell molecules with  $S = 1$  spins

**Hiroyuki Tanaka,<sup>†</sup> Daisuke Shiomi,<sup>\*,†,‡</sup> Tomoaki Ise,<sup>†,‡</sup>  
Kazunobu Sato,<sup>†</sup> and Takeji Takui<sup>\*,†</sup>**

<sup>†</sup>*Departments of Materials Science and Chemistry, Graduate School of Science, Osaka City  
University, Sumiyoshi-ku, Osaka 558-8585, Japan*

<sup>‡</sup>*PRESTO, Japan Science and Technology Agency, Saitama 332-0012, Japan*

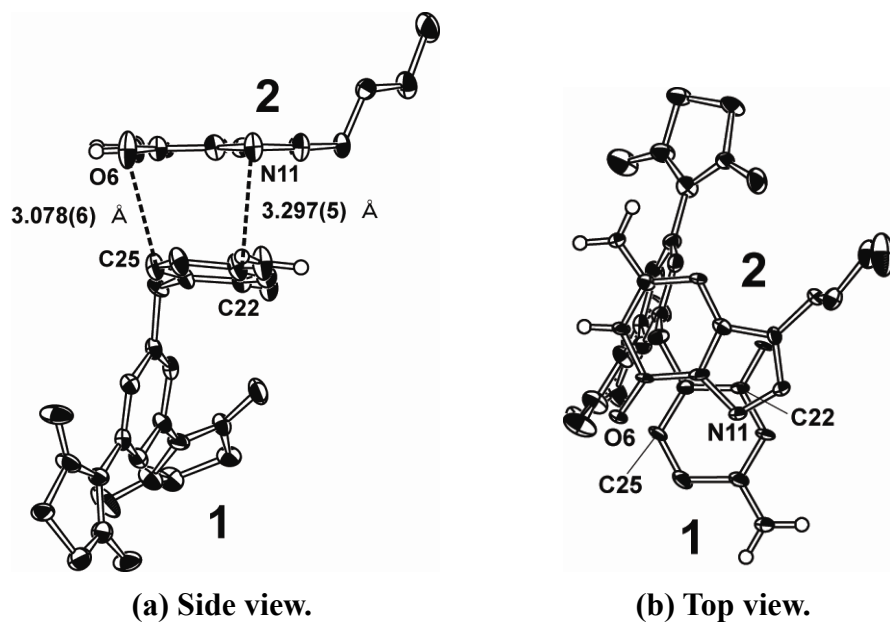

**Figure 1S.** ORTEP drawings for the stacking of the nucleobase moieties of **1** and **2** in the complex. The thermal ellipsoids are given at the 50% probability level.

**Table 1S.** Atomic spin densities  $\rho$  of the biradical **1** calculated at UB3LYP/6-31+G(d,p) level.<sup>a,b</sup>

| atom | $\rho$    | atom | $\rho$    |
|------|-----------|------|-----------|
| O1   | 0.352294  | C2   | -0.109897 |
| N1   | 0.273734  | C3   | 0.037390  |
| C7   | -0.175236 | C4   | -0.073281 |
| N2   | 0.285690  | C5   | 0.038672  |
| O2   | 0.345182  | C6   | -0.076855 |
| C8   | -0.013145 | H1   | 0.003451  |
| C9   | -0.013647 | H2   | 0.002815  |
| H4   | 0.013762  | H3   | 0.002957  |
| H5   | 0.004760  | C13  | -0.003585 |
| H6   | 0.003800  | H12  | 0.000137  |
| H7   | 0.012561  | H13  | 0.000574  |
| O3   | 0.355549  | N5   | 0.000328  |
| N3   | 0.275721  | N6   | 0.000020  |
| C10  | -0.221801 | N7   | 0.000013  |
| N4   | 0.288158  | O5   | -0.000255 |
| O4   | 0.334104  | C14  | 0.000700  |
| C11  | -0.016632 | C15  | 0.000253  |
| C12  | -0.014678 | C16  | 0.000721  |
| H8   | 0.013859  | C17  | -0.000889 |
| H9   | 0.004709  | H14  | -0.000001 |
| H10  | 0.004710  | H15  | 0.000000  |
| H11  | 0.013806  | H16  | 0.000003  |
| C1   | 0.049451  | H17  | 0.000018  |

<sup>a</sup> The convergence criteria was  $1 \times 10^{-8}$  hartree. The expectation values  $\langle S^2 \rangle$  before and after the spin-projection, *i.e.*, the annihilation of higher spin multiplicity components, are 2.1247 and 2.0070, respectively.

<sup>b</sup> The atom numbering scheme is given in Scheme 1S.

**Scheme 1S.** Atom numbering scheme of the biradical **1**, corresponding to the DFT-calculated spin density distribution in Table 1S.

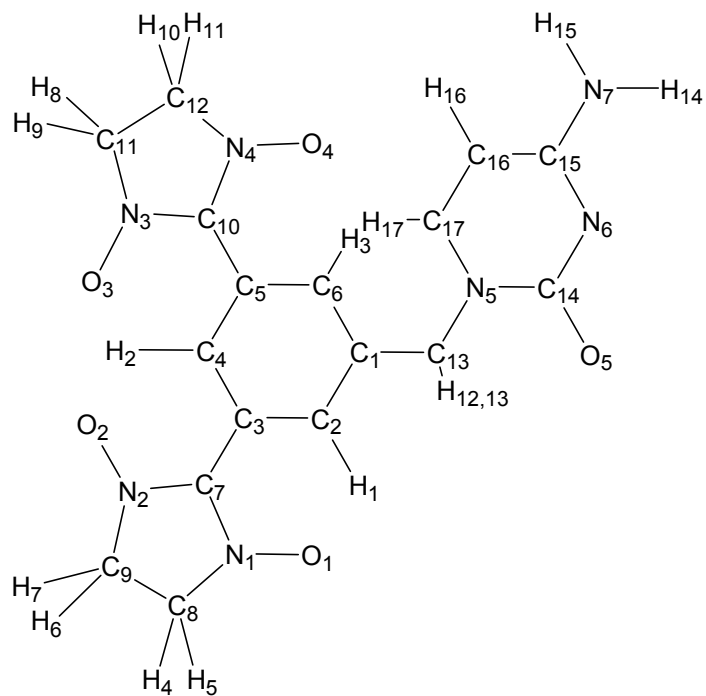

Supplement: b706521n.pdf [file b706521n.pdf]
